# Supplementary material for: Original palladium pincer complexes deriving from 1,3-bis(thiophosphinoyl)indene proligands: Csp3–H versus Csp2–H bond activation
Source: Royal Society of Chemistry journal article supplement (doi:10.1039/c1dt10118h), 2011-01-01
Supplement: c1dt10118h.pdf [file c1dt10118h.pdf]

**Original Palladium Pincer Complexes Deriving from 1,3–  
Bis(thiophosphinoyl)indene Proligands: C<sub>sp<sup>3</sup></sub>–H *versus*  
C<sub>sp<sup>2</sup></sub>–H Bond Activation**

Noel Nebra, Jérôme Lisená, Nathalie Saffon, Laurent Maron,\*

Blanca Martín-Vaca\* and Didier Bourissou\*

**Electronic Supplementary Information**

Molecular Orbitals and Z-matrices for complexes **4**, **6** and **8**

## Pd complex 4

*Molecular orbitals:* Hereafter are represented the principal molecular orbitals of **4** involving Pd and C<sub>2</sub>: HO-25 and HO-4 display  $\sigma$  interaction between C<sub>2</sub> and Pd; BV+2 displays  $\sigma^*$  interaction between C<sub>2</sub> and Pd; HO-22 displays  $\pi$  interaction between C<sub>2</sub> and Pd; HO-1 displays  $\pi^*$  interaction between C<sub>2</sub> and Pd.

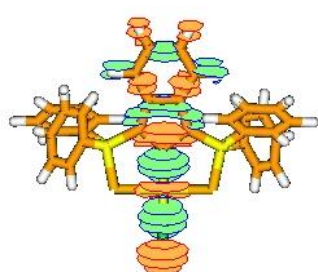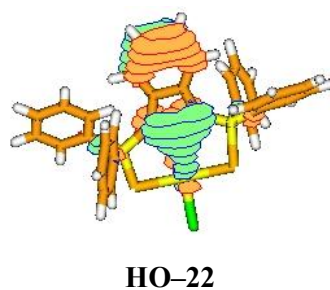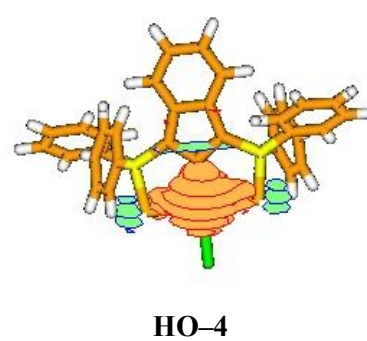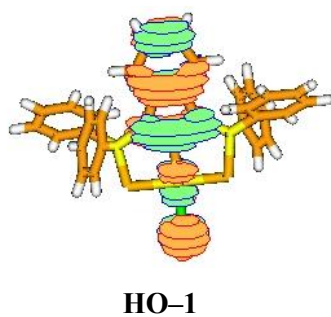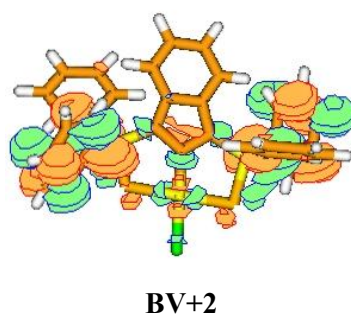

*Z*-matrix:

63

E=-2224.099090 a.u.

|    |           |           |           |    |           |           |           |
|----|-----------|-----------|-----------|----|-----------|-----------|-----------|
| C  | -3.203163 | -1.120879 | 2.580926  | C  | -3.644520 | -0.045824 | -1.426245 |
| C  | -3.789818 | -0.575372 | 1.433585  | C  | -3.717777 | -1.297910 | -2.049531 |
| C  | -5.182869 | -0.537966 | 1.316758  | C  | -4.433450 | -1.444535 | -3.235431 |
| C  | -5.982905 | -1.037581 | 2.342841  | C  | -5.076306 | -0.345607 | -3.807240 |
| C  | -5.396300 | -1.581147 | 3.485242  | C  | -4.992699 | 0.903645  | -3.195302 |
| C  | -4.006729 | -1.623286 | 3.601794  | C  | -4.274956 | 1.056788  | -2.008760 |
| P  | -2.678893 | 0.149035  | 0.147417  | H  | -3.545862 | -2.050111 | 4.488676  |
| S  | -2.304143 | 2.136115  | 0.520329  | H  | 2.481318  | -3.292130 | -0.299556 |
| Pd | -0.000058 | 2.144214  | -0.000335 | H  | 1.232102  | -5.419042 | -0.151650 |
| S  | 2.304030  | 2.136056  | -0.520981 | H  | -1.231922 | -5.419046 | 0.153145  |
| P  | 2.678858  | 0.149107  | -0.147452 | H  | -2.481222 | -3.292138 | 0.300421  |
| C  | 3.644420  | -0.045221 | 1.426321  | H  | 2.119978  | -1.152083 | -2.658089 |
| C  | 3.718022  | -1.297186 | 2.049813  | H  | 3.546217  | -2.051529 | -4.487890 |
| C  | 4.433637  | -1.443396 | 3.235798  | H  | 6.021974  | -1.974487 | -4.282582 |
| C  | 5.076096  | -0.344174 | 3.807489  | H  | 7.065501  | -1.004215 | -2.247614 |
| C  | 4.992146  | 0.904953  | 3.195345  | H  | 5.640479  | -0.119832 | -0.424353 |
| C  | 4.274459  | 1.057680  | 2.008715  | H  | 3.196757  | -2.149578 | 1.623612  |
| C  | -0.000019 | 0.173263  | -0.000069 | H  | 4.480295  | -2.415744 | 3.719581  |
| C  | 1.131713  | -0.675786 | -0.105875 | H  | 5.630127  | -0.460210 | 4.735807  |
| C  | 0.718054  | -2.054948 | -0.069136 | H  | 5.475555  | 1.768068  | 3.645770  |
| C  | -0.718000 | -2.054957 | 0.069669  | H  | 4.173317  | 2.032778  | 1.538800  |
| C  | -1.131715 | -0.675800 | 0.106001  | H  | -3.196199 | -2.150065 | -1.623235 |
| C  | 1.402401  | -3.276243 | -0.155634 | H  | -4.479840 | -2.416974 | -3.719057 |
| C  | 0.696761  | -4.474638 | -0.081558 | H  | -5.630378 | -0.461964 | -4.735494 |
| C  | -0.696617 | -4.474641 | 0.082784  | H  | -5.476415 | 1.766536  | -3.645827 |
| C  | -1.402303 | -3.276252 | 0.156514  | H  | -4.174068 | 2.031998  | -1.539026 |
| C  | 3.789893  | -0.575629 | -1.433337 | H  | -5.640493 | -0.120198 | 0.424482  |
| C  | 3.203342  | -1.121634 | -2.580494 | H  | -7.065346 | -1.004101 | 2.248106  |
| C  | 4.007004  | -1.624314 | -3.601153 | H  | -6.021635 | -1.973475 | 4.283408  |
| C  | 5.396565  | -1.581947 | -3.484579 | H  | -2.119793 | -1.151160 | 2.658503  |
| C  | 5.983067  | -1.037876 | -2.342364 | Cl | -0.000098 | 4.560836  | -0.000646 |
| C  | 5.182937  | -0.537990 | -1.316487 |    |           |           |           |

## Pd complex 6

*Molecular orbitals:* Hereafter are represented the principal molecular orbitals of **6** involving Pd and C<sub>2</sub>: HO-22 and HO-3 display  $\sigma$  interaction between C<sub>2</sub> and Pd; BV displays  $\sigma^*$  interaction between C<sub>2</sub> and Pd; HO-26 displays  $\pi$  interaction between C<sub>2</sub> and Pd; HO-1 displays  $\pi^*$  interaction between C<sub>2</sub> and Pd.

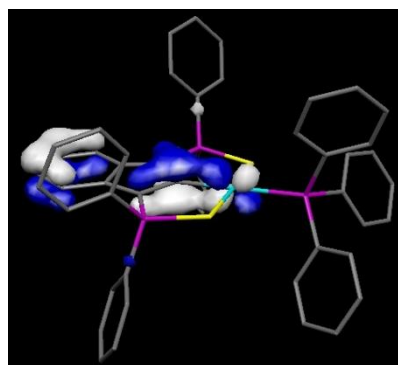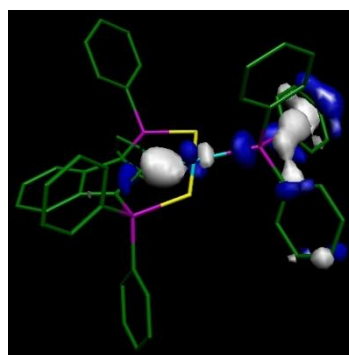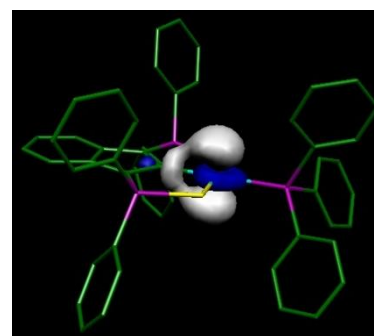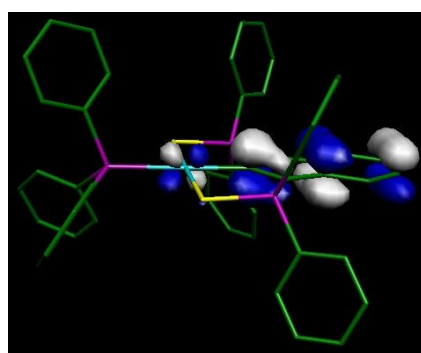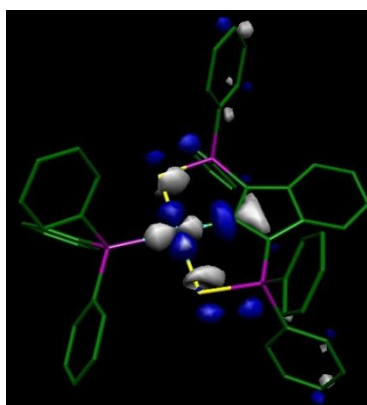

Z-matrix

96

E=-2190.236378 a.u.

|    |           |           |           |   |           |           |           |
|----|-----------|-----------|-----------|---|-----------|-----------|-----------|
| C  | 3.049273  | -1.761967 | -2.262946 | C | 5.376093  | 3.669897  | -1.398044 |
| C  | 3.732708  | -1.485137 | -1.071810 | C | 5.418173  | 2.516850  | -2.178555 |
| C  | 4.880229  | -2.218304 | -0.751857 | C | 4.745752  | 1.365382  | -1.768957 |
| C  | 5.341855  | -3.208817 | -1.617159 | C | -1.588903 | 3.769180  | 1.439159  |
| C  | 4.666915  | -3.469963 | -2.808918 | C | -1.022587 | 5.043056  | 1.576826  |
| C  | 3.520949  | -2.744363 | -3.131402 | C | -1.195734 | 5.753569  | 2.760892  |
| P  | 3.066050  | -0.126291 | -0.001344 | C | -1.933652 | 5.198330  | 3.808423  |
| C  | 3.791115  | -0.440408 | 1.676407  | C | -2.496099 | 3.930953  | 3.671853  |
| C  | 2.987664  | -1.047155 | 2.649168  | C | -2.323180 | 3.211404  | 2.489339  |
| C  | 3.501936  | -1.314636 | 3.917126  | H | -4.903897 | -2.290146 | 0.116095  |
| C  | 4.817034  | -0.973525 | 4.227250  | H | -6.977092 | -0.947236 | 0.103642  |
| C  | 5.619965  | -0.360310 | 3.265684  | H | -6.881952 | 1.527569  | 0.015749  |
| C  | 5.110668  | -0.091701 | 1.996789  | H | -4.711710 | 2.704942  | -0.059805 |
| Pd | 0.653915  | -0.002895 | -0.024468 | H | -0.444601 | 5.474646  | 0.763884  |
| C  | -1.351341 | 0.073050  | -0.019296 | H | -0.753872 | 6.740404  | 2.868171  |
| C  | -2.152944 | 1.239161  | -0.040905 | H | -2.067717 | 5.756011  | 4.731395  |
| C  | -3.547688 | 0.876558  | -0.010672 | H | -3.070977 | 3.497690  | 4.485484  |
| C  | -3.602945 | -0.557565 | 0.034445  | H | -2.754588 | 2.221208  | 2.372866  |
| C  | -2.240319 | -1.028540 | 0.023523  | H | -3.252126 | 5.034770  | -0.292523 |
| C  | -4.737920 | 1.618715  | -0.017133 | H | -4.051514 | 6.370517  | -2.213201 |
| C  | -5.957974 | 0.954903  | 0.022401  | H | -3.111395 | 5.982053  | -4.478664 |
| C  | -6.011959 | -0.448124 | 0.069849  | H | -1.370012 | 4.242139  | -4.815325 |
| C  | -4.846632 | -1.204979 | 0.074542  | H | -0.568895 | 2.897605  | -2.887633 |
| P  | -1.320223 | 2.778531  | -0.089159 | H | -0.855065 | -5.373214 | -0.807376 |
| C  | -1.865162 | 3.872126  | -1.472072 | H | -1.330231 | -6.634547 | -2.883125 |
| C  | -2.843784 | 4.853890  | -1.282421 | H | -2.671613 | -5.591173 | -4.694201 |
| C  | -3.291547 | 5.609176  | -2.365633 | H | -3.534427 | -3.278165 | -4.425189 |
| C  | -2.763599 | 5.390054  | -3.636465 | H | -3.050510 | -2.005994 | -2.342305 |
| C  | -1.786298 | 4.412354  | -3.826346 | H | -0.758652 | -2.736262 | 2.850061  |
| C  | -1.336975 | 3.653290  | -2.749431 | H | -1.612342 | -3.986829 | 4.818388  |
| P  | -1.537578 | -2.630693 | 0.060516  | H | -3.460193 | -5.624345 | 4.542824  |
| C  | -2.128405 | -3.662023 | 1.472968  | H | -4.452307 | -6.004969 | 2.298441  |
| C  | -1.571257 | -3.448316 | 2.738587  | H | -3.599381 | -4.763752 | 0.337919  |
| C  | -2.050672 | -4.153749 | 3.838377  | H | 3.410593  | 2.540297  | 1.132496  |
| C  | -3.088160 | -5.074032 | 3.682952  | H | 4.612207  | 4.566910  | 0.408225  |
| C  | -3.645275 | -5.288522 | 2.424050  | H | 5.902222  | 4.565125  | -1.718063 |
| C  | -3.167210 | -4.586195 | 1.318150  | H | 5.979464  | 2.506911  | -3.108990 |
| S  | 0.512792  | -2.351989 | 0.200428  | H | 4.792011  | 0.470325  | -2.381170 |
| S  | 0.691859  | 2.330506  | -0.322499 | H | 1.960340  | -1.307068 | 2.408917  |
| C  | -1.934094 | -3.612077 | -1.445774 | H | 2.869187  | -1.784483 | 4.665035  |
| C  | -1.446088 | -4.916374 | -1.596714 | H | 5.214458  | -1.178060 | 5.217721  |
| C  | -1.711934 | -5.624155 | -2.765125 | H | 6.643916  | -0.085230 | 3.503901  |
| C  | -2.464701 | -5.035558 | -3.783490 | H | 5.736740  | 0.401528  | 1.258873  |
| C  | -2.948636 | -3.737578 | -3.633984 | H | 5.409014  | -2.026165 | 0.176759  |
| C  | -2.682077 | -3.020323 | -2.467377 | H | 6.229728  | -3.778687 | -1.356837 |
| C  | 4.021136  | 1.359969  | -0.572650 | H | 5.028677  | -4.243656 | -3.480766 |
| C  | 3.976055  | 2.526072  | 0.205344  | H | 2.982110  | -2.952234 | -4.051553 |
| C  | 4.654392  | 3.670824  | -0.204634 | H | 2.137378  | -1.218974 | -2.497267 |

## Pd complex **8**

*Molecular orbitals:* Hereafter are represented the principal molecular orbitals of **8** involving Pd and C<sub>2</sub>: HO-25 and HO-4 display  $\sigma$  interaction between C<sub>2</sub> and Pd; BV displays  $\sigma^*$  interaction between C<sub>2</sub> and Pd; HO-22 displays  $\pi$  interaction between C<sub>2</sub> and Pd; HO displays  $\pi^*$  interaction between C<sub>2</sub> and Pd.

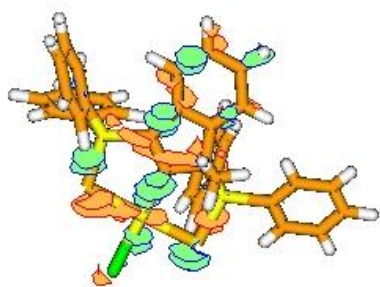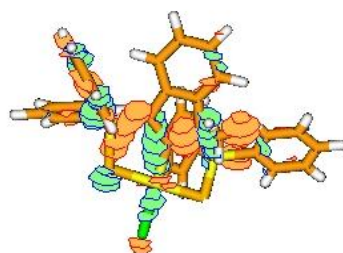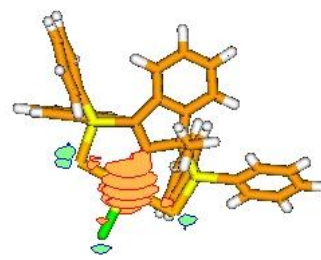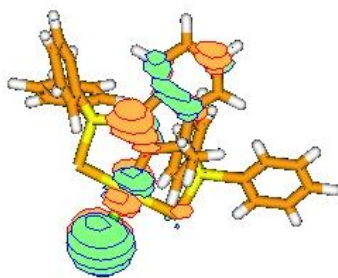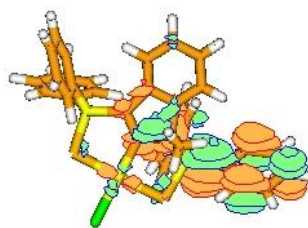

*Z*-matrix:

67

E=-2263.922150 a.u.

|    |           |           |           |    |           |           |           |
|----|-----------|-----------|-----------|----|-----------|-----------|-----------|
| C  | -4.842147 | 2.293341  | -0.332268 | C  | -2.130414 | -2.957650 | 1.699067  |
| C  | -4.244977 | 1.179317  | 0.273347  | C  | -2.251912 | -3.912716 | 0.689794  |
| C  | -4.862835 | 0.571041  | 1.372798  | C  | -2.464316 | -3.510409 | -0.627551 |
| C  | -6.058038 | 1.085815  | 1.870841  | C  | -2.564691 | -2.156378 | -0.939956 |
| C  | -6.643391 | 2.201938  | 1.275069  | H  | -6.497467 | 3.661083  | -0.305740 |
| C  | -6.037039 | 2.801049  | 0.171641  | H  | 2.263388  | 0.170287  | 2.848036  |
| P  | -2.644834 | 0.572051  | -0.400421 | H  | 1.129770  | 0.639445  | 4.996906  |
| S  | -2.552069 | 0.854696  | -2.423217 | H  | -1.157064 | 1.579688  | 5.043923  |
| Pd | -0.186335 | 0.757950  | -2.525995 | H  | -2.362286 | 2.054604  | 2.919640  |
| S  | 2.151462  | 0.485936  | -2.573096 | H  | 0.953809  | -1.994242 | 0.778066  |
| P  | 2.459887  | 0.136447  | -0.570600 | H  | 1.435564  | -4.389772 | 1.174341  |
| C  | 3.885805  | 1.114305  | 0.063491  | H  | 3.581546  | -5.373659 | 0.402226  |
| C  | 4.689214  | 0.650127  | 1.111782  | H  | 5.246129  | -3.952931 | -0.771891 |
| C  | 5.721450  | 1.448901  | 1.600400  | H  | 4.773824  | -1.558572 | -1.167730 |
| C  | 5.954444  | 2.706721  | 1.045843  | H  | 4.521814  | -0.335700 | 1.535813  |
| C  | 5.157069  | 3.167318  | -0.001789 | H  | 6.346624  | 1.084625  | 2.410700  |
| C  | 4.124472  | 2.374478  | -0.496216 | H  | 6.762307  | 3.325601  | 1.426260  |
| C  | -0.067141 | 1.024051  | -0.591465 | H  | 5.342954  | 4.142992  | -0.441340 |
| C  | 0.945960  | 0.646236  | 0.251757  | H  | 3.511106  | 2.716076  | -1.325597 |
| C  | 0.573858  | 0.814466  | 1.658216  | H  | -2.115123 | -0.867463 | 2.189347  |
| C  | -0.741742 | 1.333347  | 1.690466  | H  | -1.958040 | -3.265490 | 2.726608  |
| C  | -1.199506 | 1.575057  | 0.273532  | H  | -2.178056 | -4.969750 | 0.930434  |
| C  | 1.251310  | 0.563138  | 2.852399  | H  | -2.547160 | -4.248481 | -1.419784 |
| C  | 0.610194  | 0.834991  | 4.062716  | H  | -2.712549 | -1.836980 | -1.967640 |
| C  | -0.681016 | 1.365174  | 4.091463  | H  | -4.427859 | -0.312006 | 1.828866  |
| C  | -1.361383 | 1.630488  | 2.897764  | H  | -6.535968 | 0.606029  | 2.720101  |
| C  | 2.840493  | -1.619265 | -0.199848 | H  | -7.577550 | 2.597733  | 1.663459  |
| C  | 1.897911  | -2.419663 | 0.451786  | H  | -4.382180 | 2.742908  | -1.207134 |
| C  | 2.170494  | -3.769730 | 0.669573  | Cl | -0.314376 | 0.449514  | -4.867288 |
| C  | 3.373986  | -4.320473 | 0.234737  | C  | -1.455776 | 3.068174  | 0.003731  |
| C  | 4.311515  | -3.522775 | -0.423773 | H  | -2.280657 | 3.442713  | 0.616970  |
| C  | 4.047913  | -2.174496 | -0.644007 | H  | -0.551002 | 3.624433  | 0.265392  |
| C  | -2.454231 | -1.196646 | 0.072714  | H  | -1.674388 | 3.242703  | -1.052143 |
| C  | -2.228710 | -1.599984 | 1.397365  |    |           |           |           |
